# Supplementary material for: Safety of Intracoronary Infusion of 20 Million C-Kit Positive Human Cardiac Stem Cells in Pigs
Source: PubMed Central journal article supplement (PMC4408046; doi:10.1371/journal.pone.0124227), 2015-04-23
Supplement: pone.0124227.s004.pdf [file pone.0124227.s004.pdf]

**S4 Table: CK-MB.** (Reference Fig. 7)

| Plasma CK-MB (ng/ml) in Pigs with hCSC Intracoronary Administration |                  |          |          |          |          |                     |          |                 |
|---------------------------------------------------------------------|------------------|----------|----------|----------|----------|---------------------|----------|-----------------|
| Pig#                                                                | Group Assignment | BSL      | 6 h      | 12 h     | 24 h     | 1wk                 | 30d      | Cumulative cTnl |
| 91083                                                               | Vehicle          | 0.046    | 0.038    | 0.039    | 0.04     | 0.021               | 0.077    | 1.395875        |
| 90960                                                               | Vehicle          | 0.027    | 0.017    | 0.037    | 0.077    | 0.036               | 0.052    | 1.41875         |
| 90961                                                               | Vehicle          | 0.059    | 0.062    | 0.044    | 0.095    | 0.057               | 0.061    | 1.935125        |
| 90963                                                               | Vehicle          | 0.046    | 0.047    | 0.016    | 0.037    | 0.082               | 0.044    | 1.88475         |
| 90964                                                               | Vehicle          | 0.015    | 0.03     | 0.041    | 0.028    | 0.075               | 0.049    | 1.78175         |
|                                                                     |                  |          |          |          |          |                     |          |                 |
| Mean                                                                |                  | 0.0386   | 0.0388   | 0.0354   | 0.0554   | 0.0542              | 0.0566   | 1.68325         |
| SEM                                                                 |                  | 0.007801 | 0.007612 | 0.004986 | 0.012964 | 0.011504            | 0.005802 | 0.11538         |
| n                                                                   |                  | 5        | 5        | 5        | 5        | 5                   | 5        | 5               |
|                                                                     |                  |          |          |          |          |                     |          |                 |
| 91079                                                               | CSCs             | 0.052    | 0.04     | 0.096    | 0.033    | 0.021               | 0.061    | 1.21775         |
| 91080                                                               | CSCs             | 0.028    | 0.018    | 0.037    | 0.029    | 0.024               | 0.046    | 1.021125        |
| 91081                                                               | CSCs             | 0.012    | 0.048    | 0.058    | 0.063    | 0.003               | 0.047    | 0.836           |
| 91082                                                               | CSCs             | 0.022    | 0.049    | 0.034    | 0.032    | 0                   | 0.055    | 0.78625         |
| 91084                                                               | CSCs             | 0        | 0.072    | 0.064    | 0.075    | 0.014               | 0.068    | 1.27075         |
| 91085                                                               | CSCs             | 0.021    | 0.046    | 0.129    | 0.099    | 0.047               | 0.056    | 1.73075         |
| 91086                                                               | CSCs             | 0.089    | 0.059    | 0.087    | 0.059    | 0.051               | 0.048    | 1.63075         |
| 90959                                                               | CSCs             | 0.066    | 0.059    | 0.049    | 0.04     | 0.046               | 0.068    | 1.686375        |
| 90962                                                               | CSCs             | 0.062    | 0.075    | 0.055    | 0.056    | 0.068               | 0.058    | 1.944125        |
|                                                                     |                  |          |          |          |          |                     |          |                 |
| Mean                                                                |                  | 0.039111 | 0.051778 | 0.067667 | 0.054    | 0.030444            | 0.056333 | 1.34709         |
| SEM                                                                 |                  | 0.009797 | 0.005759 | 0.010293 | 0.007748 | 0.007844            | 0.002794 | 0.13963         |
| n                                                                   |                  | 9        | 9        | 9        | 9        | 9                   | 9        | 9               |
|                                                                     |                  |          |          |          |          |                     |          |                 |
| 2-way RM ANOVA                                                      | P vs. Vehicle    | 0.189    | 0.577    | 0.068    | 0.448    | 0.002 (ctrl higher) | 0.919    | 0.369           |
