# Supplementary material for: Safety of Intracoronary Infusion of 20 Million C-Kit Positive Human Cardiac Stem Cells in Pigs
Source: PubMed Central journal article supplement (PMC4408046; doi:10.1371/journal.pone.0124227), 2015-04-23
Supplement: pone.0124227.s006.pdf [file pone.0124227.s006.pdf]

**S6 Table: BUN.** (Reference Fig. 8B)

| <b>BUN (mg/dl) dataset</b>  |          |          |          |          |          |          |
|-----------------------------|----------|----------|----------|----------|----------|----------|
| Treatment (Tx)              |          |          |          |          |          |          |
|                             | BSL      | 6h       | 12h      | 24h      | 1wk      | 1mo      |
| 91079                       | 11       | 16       | 25       | 19       | 10       | 8        |
| 91080                       | 8        | 13       | 14       | 12       | 13       | 13       |
| 91081                       | 14       | 19       | 24       | 20       | 13       | 14       |
| 91082                       | 10       | 14       | 16       | 14       | 12       | 10       |
| 91084                       | 11       | 15       | 18       | 18       | 16       | 14       |
| 91085                       | 11       | 16       | 18       | 17       | 14       | 11       |
| 91086                       | 13       | 14       | 17       | 15       | 13       | 12       |
| 90959                       | 8        | 12       | 17       | 19       | 12       | 13       |
| 90962                       | 10       | 15       | 15       | 14       | 13       | 9        |
| Average Tx Group (n=9)      | 10.66667 | 14.88889 | 18.22222 | 16.44444 | 12.88889 | 11.55556 |
| Std Deviation Tx Group      | 2        | 2.027588 | 3.800585 | 2.788867 | 1.615893 | 2.185813 |
|                             |          |          |          |          |          |          |
|                             |          |          |          |          |          |          |
| Control (Ctrl)              |          |          |          |          |          |          |
|                             | BSL      | 6h       | 12h      | 24h      | 1W       | 1M       |
| (Ctrl) 91083                | 12       | 13       | 15       | 14       | 12       | 10       |
| (Ctrl) 90960                | 16       | 23       | 25       | 23       | 13       | 15       |
| (Ctrl) 90961                | 15       | 17       | 20       | 15       | 14       | 15       |
| (Ctrl) 90963                | 13       | 19       | 25       | 19       | 16       | 17       |
| (Ctrl) 90964                | 8        | 16       | 18       | 17       | 12       | 14       |
| Average Control Group (n=5) | 12.8     | 17.6     | 20.6     | 17.6     | 13.4     | 14.2     |
| Std Deviation Control Group | 3.114482 | 3.714835 | 4.393177 | 3.577709 | 1.67332  | 2.588436 |
