# Supplementary material for: Safety of Intracoronary Infusion of 20 Million C-Kit Positive Human Cardiac Stem Cells in Pigs
Source: PubMed Central journal article supplement (PMC4408046; doi:10.1371/journal.pone.0124227), 2015-04-23
Supplement: pone.0124227.s010.pdf [file pone.0124227.s010.pdf]

**S10 Table: ALT.** (Reference Fig. 9D)

| <b>ALT (IU/L) dataset</b>   |          |          |          |          |          |          |
|-----------------------------|----------|----------|----------|----------|----------|----------|
| Treatment (Tx)              |          |          |          |          |          |          |
| Pig#                        | BSL      | 6h       | 12h      | 24h      | 1W       | 1M       |
| 91079                       | 31       | 44       | 67       | 97       | 64       | 38       |
| 91080                       | 34       | 41       | 46       | 50       | 35       | 45       |
| 91081                       | 40       | 56       | 77       | 95       | 55       | 38       |
| 91082                       | 50       | 53       | 53       | 53       | 43       | 33       |
| 91084                       | 25       | 27       | 31       | 33       | 36       | 22       |
| 91085                       | 36       | 55       | 69       | 81       | 53       | 32       |
| 91086                       | 36       | 113      | 51       | 51       | 40       | 39       |
| 90959                       | 25       | 33       | 44       | 38       | 24       | 24       |
| 90962                       | 52       | 61       | 58       | 59       | 56       | 51       |
| Average Tx Group (n=9)      | 36.55556 | 53.66667 | 55.11111 | 61.88889 | 45.11111 | 35.77778 |
| Std Deviation Tx Group      | 9.593111 | 24.93492 | 14.27799 | 23.57671 | 12.73229 | 9.270623 |
|                             |          |          |          |          |          |          |
|                             |          |          |          |          |          |          |
| Control (Ctrl)              |          |          |          |          |          |          |
| Pig#                        | BSL      | 6h       | 12h      | 24h      | 1W       | 1M       |
| (Ctrl) 91083                | 40       | 49       | 57       | 61       | 47       | 58       |
| (Ctrl) 90960                | 30       | 47       | 54       | 62       | 53       | 34       |
| (Ctrl) 90961                | 38       | 38       | 54       | 68       | 47       | 32       |
| (Ctrl) 90963                | 30       | 41       | 69       | 105      | 70       | 32       |
| (Ctrl) 90964                | 30       | 33       | 40       | 42       | 34       | 30       |
| Average Control Group (n=5) | 33.6     | 41.6     | 54.8     | 67.6     | 50.2     | 37.2     |
| Std Deviation Control Group | 4.97996  | 6.542171 | 10.32957 | 23.07163 | 13.06522 | 11.71324 |
