# Supplementary material for: Safety of Intracoronary Infusion of 20 Million C-Kit Positive Human Cardiac Stem Cells in Pigs
Source: PLoS One. 2015 Apr 23;10(4):e0124227. doi: 10.1371/journal.pone.0124227 (PMC4408046; doi:10.1371/journal.pone.0124227)
Supplement: S2 Table — (Reference Fig 5). (PDF) [file pone.0124227.s002.pdf]

S2 Table: Echocardiographic data. (Reference Fig. 5)

| Pig#      | Group   | time point | Anterior Wall Thickness at diastole (cm) | LV End-Diastolic Diameter (cm) | Posterior Wall Thickness at diastole (cm) | Anterior Wall Thickness at systole (cm) | LV End-Systolic Diameter (cm) | Posterior Wall Thickness at systole (cm) | LV End-Diastolic Area (cm²) | LV End-Systolic Area (cm²) | Fractional Shortening (%) | Fractional Area Change (%) | Ejection Fraction (%) | Ejection Fraction (%) | LV End-Diastolic Volume (mL) | LV End-Systolic Volume (mL) | Anterior Wall Thickening Fraction (%) | Posterior Wall Thickening Fraction (%) |
|-----------|---------|------------|------------------------------------------|--------------------------------|-------------------------------------------|-----------------------------------------|-------------------------------|------------------------------------------|-----------------------------|----------------------------|---------------------------|----------------------------|-----------------------|-----------------------|------------------------------|-----------------------------|---------------------------------------|----------------------------------------|
| Pig#1083  | Vehicle | BSL        | 0.71                                     | 3.85                           | 0.92                                      | 1.13                                    | 2.80                          | 1.21                                     | 10.82                       | 6.14                       | 27.27                     | 43.25                      | 47.11                 | 53.77                 | 63.91                        | 29.55                       | 59.15                                 | 31.52                                  |
| Pig#90960 | Vehicle | BSL        | 0.76                                     | 3.60                           | 0.67                                      | 1.05                                    | 2.46                          | 1.03                                     | 8.76                        | 4.46                       | 31.67                     | 49.09                      | 53.31                 | 60.61                 | 54.43                        | 21.44                       | 38.71                                 | 54.42                                  |
| Pig#90961 | Vehicle | BSL        | 0.65                                     | 3.93                           | 0.90                                      | 1.26                                    | 2.36                          | 1.29                                     | 13.08                       | 5.94                       | 39.95                     | 54.59                      | 63.94                 | 71.20                 | 67.12                        | 19.33                       | 93.85                                 | 43.33                                  |
| Pig#90963 | Vehicle | BSL        | 0.71                                     | 3.36                           | 0.81                                      | 1.15                                    | 2.36                          | 1.13                                     | 7.83                        | 4.48                       | 29.76                     | 42.78                      | 50.67                 | 58.07                 | 46.10                        | 19.33                       | 61.97                                 | 39.51                                  |
| Pig#90964 | Vehicle | BSL        | 0.64                                     | 4.36                           | 0.80                                      | 1.17                                    | 3.04                          | 1.35                                     | 16.88                       | 8.75                       | 30.28                     | 48.16                      | 51.38                 | 57.88                 | 85.82                        | 36.15                       | 82.81                                 | 68.75                                  |
|           |         | mean       | 0.69                                     | 3.82                           | 0.82                                      | 1.15                                    | 2.60                          | 1.20                                     | 11.47                       | 5.95                       | 31.79                     | 47.57                      | 53.28                 | 60.30                 | 63.48                        | 25.16                       | 67.30                                 | 47.51                                  |
|           |         | SEM        | 0.02                                     | 0.17                           | 0.04                                      | 0.03                                    | 0.14                          | 0.06                                     | 1.63                        | 0.78                       | 2.16                      | 2.16                       | 2.85                  | 2.94                  | 6.70                         | 3.33                        | 9.64                                  | 6.47                                   |
|           |         | n          | 5.00                                     | 5.00                           | 5.00                                      | 5.00                                    | 5.00                          | 5.00                                     | 5.00                        | 5.00                       | 5.00                      | 5.00                       | 5.00                  | 5.00                  | 5.00                         | 5.00                        | 5.00                                  | 5.00                                   |
| Pig#1083  | Vehicle | 24h        | 0.66                                     | 3.82                           | 0.86                                      | 1.05                                    | 2.64                          | 1.24                                     | 14.24                       | 6.49                       | 30.89                     | 54.42                      | 52.24                 | 59.26                 | 62.73                        | 25.56                       | 59.09                                 | 44.19                                  |
| Pig#90960 | Vehicle | 24h        | 0.71                                     | 3.86                           | 0.60                                      | 1.13                                    | 2.79                          | 0.73                                     | 12.49                       | 6.49                       | 28.24                     | 48.04                      | 48.50                 | 55.25                 | 64.31                        | 28.78                       | 59.15                                 | 21.67                                  |
| Pig#90961 | Vehicle | 24h        | 0.62                                     | 3.86                           | 0.80                                      | 1.23                                    | 2.51                          | 1.25                                     | 13.86                       | 5.25                       | 34.97                     | 62.12                      | 57.72                 | 64.94                 | 64.31                        | 22.54                       | 98.39                                 | 56.25                                  |
| Pig#90963 | Vehicle | 24h        | 0.70                                     | 3.19                           | 0.69                                      | 1.07                                    | 2.25                          | 1.00                                     | 11.50                       | 7.22                       | 29.47                     | 37.22                      | 50.25                 | 57.82                 | 40.65                        | 17.15                       | 53.08                                 | 45.77                                  |
| Pig#90964 | Vehicle | 24h        | 0.66                                     | 4.27                           | 0.83                                      | 1.11                                    | 2.96                          | 0.98                                     | 13.97                       | 6.83                       | 30.68                     | 51.11                      | 51.95                 | 58.55                 | 81.71                        | 33.87                       | 68.18                                 | 18.07                                  |
|           |         | mean       | 0.67                                     | 3.80                           | 0.76                                      | 1.12                                    | 2.63                          | 1.04                                     | 13.21                       | 6.46                       | 30.85                     | 50.58                      | 52.13                 | 59.17                 | 62.74                        | 25.58                       | 67.58                                 | 37.19                                  |
|           |         | SEM        | 0.02                                     | 0.17                           | 0.05                                      | 0.03                                    | 0.12                          | 0.10                                     | 0.52                        | 0.33                       | 1.14                      | 4.08                       | 1.55                  | 1.60                  | 6.53                         | 2.82                        | 8.07                                  | 7.39                                   |
|           |         | n          | 5.00                                     | 5.00                           | 5.00                                      | 5.00                                    | 5.00                          | 5.00                                     | 5.00                        | 5.00                       | 5.00                      | 5.00                       | 5.00                  | 5.00                  | 5.00                         | 5.00                        | 5.00                                  | 5.00                                   |
| Pig#1083  | Vehicle | 1Wk        | 0.68                                     | 4.06                           | 0.81                                      | 1.16                                    | 2.79                          | 1.11                                     | 12.07                       | 4.44                       | 31.28                     | 63.21                      | 52.78                 | 59.61                 | 72.52                        | 29.29                       | 70.59                                 | 37.04                                  |
| Pig#90960 | Vehicle | 1Wk        | 0.68                                     | 3.73                           | 0.71                                      | 1.16                                    | 2.66                          | 1.05                                     | 12.07                       | 6.86                       | 28.69                     | 45.56                      | 49.14                 | 56.06                 | 59.26                        | 26.04                       | 70.59                                 | 47.89                                  |
| Pig#90961 | Vehicle | 1Wk        | 0.66                                     | 4.09                           | 0.80                                      | 1.37                                    | 2.71                          | 1.33                                     | 11.35                       | 5.10                       | 33.74                     | 55.07                      | 56.10                 | 63.05                 | 73.79                        | 27.26                       | 107.58                                | 66.25                                  |
| Pig#90963 | Vehicle | 1Wk        | 0.67                                     | 3.29                           | 0.78                                      | 1.06                                    | 2.40                          | 1.17                                     | 9.97                        | 5.57                       | 27.05                     | 44.13                      | 46.79                 | 53.98                 | 43.81                        | 20.16                       | 58.21                                 | 50.00                                  |
| Pig#90964 | Vehicle | 1Wk        | 0.61                                     | 4.29                           | 0.82                                      | 1.14                                    | 3.01                          | 1.21                                     | 11.64                       | 7.07                       | 29.84                     | 39.26                      | 50.77                 | 57.29                 | 82.61                        | 35.29                       | 86.89                                 | 47.56                                  |
|           |         | mean       | 0.66                                     | 3.89                           | 0.78                                      | 1.18                                    | 2.71                          | 1.17                                     | 11.53                       | 5.81                       | 30.12                     | 49.45                      | 51.11                 | 58.00                 | 66.40                        | 27.61                       | 78.77                                 | 49.75                                  |
|           |         | SEM        | 0.01                                     | 0.18                           | 0.02                                      | 0.05                                    | 0.10                          | 0.05                                     | 0.44                        | 0.51                       | 1.14                      | 4.29                       | 1.59                  | 1.56                  | 6.77                         | 2.45                        | 8.52                                  | 4.70                                   |
|           |         | n          | 5.00                                     | 5.00                           | 5.00                                      | 5.00                                    | 5.00                          | 5.00                                     | 5.00                        | 5.00                       | 5.00                      | 5.00                       | 5.00                  | 5.00                  | 5.00                         | 5.00                        | 5.00                                  | 5.00                                   |
| Pig#1083  | Vehicle | 1Mo        | 0.68                                     | 4.23                           | 0.88                                      | 1.21                                    | 2.93                          | 1.33                                     | 12.98                       | 6.88                       | 30.73                     | 47.00                      | 52.02                 | 58.66                 | 79.91                        | 33.03                       | 77.94                                 | 51.14                                  |
| Pig#90960 | Vehicle | 1Mo        | 0.69                                     | 3.86                           | 0.71                                      | 1.00                                    | 2.73                          | 1.22                                     | 12.45                       | 6.89                       | 29.27                     | 44.66                      | 49.98                 | 56.83                 | 64.31                        | 31.76                       | 44.93                                 | 71.83                                  |
| Pig#90961 | Vehicle | 1Mo        | 0.71                                     | 4.16                           | 0.88                                      | 1.23                                    | 2.88                          | 1.11                                     | 13.21                       | 6.52                       | 30.77                     | 64.64                      | 52.07                 | 58.77                 | 76.82                        | 37.76                       | 73.24                                 | 49.44                                  |
| Pig#90963 | Vehicle | 1Mo        | 0.62                                     | 3.80                           | 0.81                                      | 1.11                                    | 2.53                          | 1.12                                     | 13.12                       | 7.09                       | 33.42                     | 45.96                      | 55.67                 | 61.95                 | 61.95                        | 23.99                       | 79.03                                 | 58.02                                  |
| Pig#90964 | Vehicle | 1Mo        | 0.67                                     | 4.56                           | 0.91                                      | 1.18                                    | 3.13                          | 1.33                                     | 14.06                       | 7.58                       | 31.36                     | 46.09                      | 52.89                 | 59.30                 | 95.36                        | 38.82                       | 76.12                                 | 46.15                                  |
|           |         | mean       | 0.67                                     | 4.12                           | 0.84                                      | 1.15                                    | 2.84                          | 1.30                                     | 13.16                       | 6.99                       | 31.11                     | 46.87                      | 52.53                 | 59.29                 | 75.67                        | 30.86                       | 70.25                                 | 55.32                                  |
|           |         | SEM        | 0.02                                     | 0.14                           | 0.04                                      | 0.04                                    | 0.10                          | 0.02                                     | 0.26                        | 0.17                       | 0.67                      | 1.01                       | 0.92                  | 0.99                  | 6.02                         | 2.65                        | 6.41                                  | 4.56                                   |
|           |         | n          | 5.00                                     | 5.00                           | 5.00                                      | 5.00                                    | 5.00                          | 5.00                                     | 5.00                        | 5.00                       | 5.00                      | 5.00                       | 5.00                  | 5.00                  | 5.00                         | 5.00                        | 5.00                                  | 5.00                                   |
| Pig#1079  | CSCs    | BSL        | 0.61                                     | 3.27                           | 0.62                                      | 0.99                                    | 2.47                          | 0.87                                     | 10.83                       | 7.50                       | 24.46                     | 30.75                      | 42.94                 | 49.82                 | 43.17                        | 21.66                       | 62.95                                 | 40.10                                  |
| Pig#1080  | CSCs    | BSL        | 0.74                                     | 3.81                           | 0.81                                      | 1.11                                    | 2.64                          | 1.20                                     | 11.19                       | 5.96                       | 30.71                     | 46.74                      | 51.99                 | 59.01                 | 62.34                        | 25.56                       | 50.00                                 | 48.15                                  |
| Pig#1081  | CSCs    | BSL        | 0.65                                     | 3.70                           | 0.60                                      | 1.02                                    | 2.50                          | 0.97                                     | 13.20                       | 7.32                       | 32.43                     | 44.55                      | 54.35                 | 61.60                 | 58.13                        | 22.32                       | 57.41                                 | 61.81                                  |
| Pig#1082  | CSCs    | BSL        | 0.74                                     | 3.97                           | 0.68                                      | 1.12                                    | 2.99                          | 1.13                                     | 10.09                       | 5.90                       | 24.69                     | 41.53                      | 43.28                 | 49.51                 | 68.76                        | 34.72                       | 51.35                                 | 66.18                                  |
| Pig#1086  | CSCs    | BSL        | 0.69                                     | 4.29                           | 0.73                                      | 1.13                                    | 3.06                          | 1.08                                     | 12.66                       | 6.52                       | 28.67                     | 48.50                      | 49.12                 | 55.53                 | 82.61                        | 36.73                       | 63.77                                 | 47.95                                  |
| Pig#1084  | CSCs    | BSL        | 0.57                                     | 3.61                           | 0.61                                      | 1.06                                    | 2.32                          | 0.99                                     | 10.36                       | 5.03                       | 35.73                     | 51.45                      | 58.70                 | 66.20                 | 54.80                        | 18.52                       | 85.96                                 | 62.30                                  |
| Pig#1085  | CSCs    | BSL        | 0.80                                     | 4.35                           | 0.75                                      | 1.06                                    | 3.15                          | 1.20                                     | 14.08                       | 9.16                       | 27.59                     | 34.94                      | 47.56                 | 53.82                 | 85.36                        | 39.42                       | 32.50                                 | 60.00                                  |
| Pig#90959 | CSCs    | BSL        | 0.73                                     | 3.80                           | 0.69                                      | 1.17                                    | 2.70                          | 1.08                                     | 9.24                        | 4.73                       | 27.22                     | 48.81                      | 47.92                 | 58.50                 | 61.95                        | 27.02                       | 69.57                                 | 27.27                                  |
| Pig#90962 | CSCs    | BSL        | 0.69                                     | 3.69                           | 0.70                                      | 1.05                                    | 2.71                          | 1.01                                     | 10.46                       | 6.68                       | 26.56                     | 36.14                      | 46.06                 | 52.79                 | 57.75                        | 27.26                       | 52.39                                 | 44.08                                  |
|           |         | mean       | 0.69                                     | 3.82                           | 0.70                                      | 1.08                                    | 2.73                          | 1.05                                     | 11.35                       | 6.53                       | 28.67                     | 42.60                      | 49.00                 | 55.79                 | 63.49                        | 28.13                       | 58.43                                 | 50.87                                  |
|           |         | SEM        | 0.02                                     | 0.11                           | 0.03                                      | 0.02                                    | 0.10                          | 0.04                                     | 0.54                        | 0.45                       | 1.23                      | 2.40                       | 1.73                  | 1.84                  | 4.48                         | 2.42                        | 4.95                                  | 4.25                                   |
|           |         | n          | 9.00                                     | 9.00                           | 9.00                                      | 9.00                                    | 9.00                          | 9.00                                     | 9.00                        | 9.00                       | 9.00                      | 9.00                       | 9.00                  | 9.00                  | 9.00                         | 9.00                        | 9.00                                  | 9.00                                   |
| Pig#1079  | CSCs    | 24h        | 0.61                                     | 3.79                           | 0.66                                      | 0.82                                    | 2.79                          | 1.00                                     | 11.33                       | 6.32                       | 26.39                     | 44.22                      | 45.81                 | 52.42                 | 61.56                        | 29.29                       | 34.43                                 | 51.52                                  |
| Pig#1080  | CSCs    | 24h        | 0.68                                     | 3.84                           | 0.82                                      | 1.07                                    | 2.68                          | 1.20                                     | 11.00                       | 5.44                       | 30.21                     | 50.55                      | 51.29                 | 58.24                 | 63.52                        | 26.52                       | 57.35                                 | 46.34                                  |
| Pig#1081  | CSCs    | 24h        | 0.67                                     | 3.61                           | 0.73                                      | 0.99                                    | 2.40                          | 0.96                                     | 8.88                        | 4.40                       | 33.52                     | 51.00                      | 55.80                 | 63.21                 | 54.80                        | 20.16                       | 47.76                                 | 31.51                                  |
| Pig#1082  | CSCs    | 24h        | 0.72                                     | 4.30                           | 0.67                                      | 1.18                                    | 3.10                          | 1.02                                     | 11.08                       | 5.49                       | 27.91                     | 50.45                      | 48.03                 | 54.36                 | 83.07                        | 37.92                       | 63.89                                 | 52.24                                  |
| Pig#1086  | CSCs    | 24h        | 0.68                                     | 4.12                           | 0.71                                      | 0.95                                    | 3.00                          | 1.02                                     | 10.66                       | 5.16                       | 27.18                     | 51.59                      | 46.98                 | 53.38                 | 75.08                        | 35.00                       | 39.15                                 | 43.26                                  |
| Pig#1084  | CSCs    | 24h        | 0.62                                     | 3.89                           | 0.78                                      | 1.12                                    | 2.73                          | 1.06                                     | 9.95                        | 4.60                       | 29.82                     | 53.77                      | 50.75                 | 57.62                 | 65.51                        | 27.76                       | 80.65                                 | 35.90                                  |
| Pig#1085  | CSCs    | 24h        | 0.75                                     | 3.85                           | 0.85                                      | 1.14                                    | 2.56                          | 1.25                                     | 11.23                       | 5.64                       | 33.51                     | 49.78                      | 55.79                 | 62.95                 | 63.91                        | 23.68                       | 52.00                                 | 47.06                                  |
| Pig#90959 | CSCs    | 24h        | 0.82                                     | 3.79                           | 0.82                                      | 1.27                                    | 2.60                          | 1.10                                     | 10.86                       | 5.49                       | 31.40                     | 49.85                      | 52.84                 | 60.03                 | 61.56                        | 24.61                       | 51.19                                 | 34.15                                  |
| Pig#90962 | CSCs    | 24h        | 0.67                                     | 4.35                           | 0.61                                      | 1.28                                    | 3.26                          | 0.89                                     | 16.10                       | 8.25                       | 25.06                     | 48.76                      | 43.84                 | 49.80                 | 85.36                        | 42.85                       | 91.04                                 | 45.90                                  |
|           |         | mean       | 0.69                                     | 3.95                           | 0.74                                      | 1.09                                    | 2.79                          | 1.06                                     | 11.24                       | 5.64                       | 29.44                     | 49.95                      | 50.13                 | 56.89                 | 68.26                        | 29.75                       | 57.50                                 | 43.10                                  |
|           |         | SEM        | 0.02                                     | 0.08                           | 0.03                                      | 0.05                                    | 0.09                          | 0.04                                     | 0.66                        | 0.38                       | 1.01                      | 0.86                       | 1.43                  | 1.57                  | 3.49                         | 2.46                        | 6.16                                  | 2.51                                   |
|           |         | n          | 9.00                                     | 9.00                           | 9.00                                      | 9.00                                    | 9.00                          | 9.00                                     | 9.00                        | 9.00                       | 9.00                      | 9.00                       | 9.00                  | 9.00                  | 9.00                         | 9.00                        | 9.00                                  | 9.00                                   |
| Pig#1079  | CSCs    | 1Wk        | 0.65                                     | 4.10                           | 0.81                                      | 1.14                                    | 2.85                          | 1.10                                     | 12.80                       | 6.65                       | 30.49                     | 48.05                      | 51.68                 | 58.41                 | 74.22                        | 30.87                       | 75.38                                 | 35.80                                  |
| Pig#1080  | CSCs    | 1Wk        | 0.70                                     | 3.79                           | 0.78                                      | 1.06                                    | 2.81                          | 1.11                                     | 12.13                       | 8.61                       | 25.86                     | 29.02                      | 45.03                 | 51.58                 | 61.56                        | 29.81                       | 51.43                                 | 42.31                                  |
| Pig#1081  | CSCs    | 1Wk        | 0.58                                     | 3.52                           | 0.65                                      | 0.96                                    | 2.42                          | 0.97                                     | 11.27                       | 5.59                       | 31.25                     | 50.40                      | 52.73                 | 60.09                 | 51.57                        | 20.58                       | 65.52                                 | 49.23                                  |
| Pig#1082  | CSCs    | 1Wk        | 0.72                                     | 4.33                           | 0.61                                      | 1.20                                    | 3.07                          | 0.95                                     | 16.86                       | 8.65                       | 29.10                     | 48.70                      | 49.73                 | 56.15                 | 84.44                        | 37.03                       | 66.67                                 | 55.74                                  |
| Pig#1086  | CSCs    | 1Wk        | 0.70                                     | 3.92                           | 0.71                                      | 1.23                                    | 2.55                          | 1.17                                     | 11.35                       | 4.43                       | 34.95                     | 60.97                      | 57.68                 | 64.85                 | 66.72                        | 23.45                       | 75.71                                 | 64.79                                  |
| Pig#1084  | CSCs    | 1Wk        | 0.76                                     | 3.67                           | 0.72                                      | 1.27                                    | 2.34                          | 1.19                                     | 10.52                       | 4.13                       | 36.24                     | 60.74                      | 59.35                 | 66.81                 | 57.00                        | 18.92                       | 67.11                                 | 65.28                                  |
| Pig#1085  | CSCs    | 1Wk        | 0.76                                     | 3.78                           | 0.85                                      | 1.18                                    | 2.74                          | 1.16                                     | 11.21                       | 5.78                       | 27.51                     | 48.44                      | 47.46                 | 54.21                 | 61.18                        | 28.01                       | 55.26                                 | 36.47                                  |
| Pig#1059  | CSCs    | 1Wk        | 0.76                                     | 3.78                           | 0.85                                      | 1.18                                    | 2.74                          | 1.16                                     | 11.67                       | 6.30                       | 27.51                     | 46.02                      | 47.46                 | 54.21                 | 61.18                        | 28.01                       | 55.26                                 | 36.47                                  |
| Pig#90962 | CSCs    | 1Wk        | 0.76                                     | 3.77                           | 0.72                                      | 1.34                                    | 2.66                          | 1.02                                     | 11.20                       | 5.46                       | 29.44                     | 51.25                      | 50.22                 | 57.17                 | 60.79                        | 26.04                       | 76.32                                 | 41.67                                  |
|           |         | mean       | 0.71                                     | 3.85                           | 0.74                                      | 1.17                                    | 2.69                          | 1.09                                     | 12.11                       | 6.18                       | 30.26                     | 49.29                      | 51.26                 | 58.16                 | 64.30                        | 26.97                       | 65.41                                 | 47.53                                  |
|           |         | SEM        | 0.02                                     | 0.08                           | 0.03                                      | 0.04                                    | 0.08                          | 0.03                                     | 0.63                        | 0.53                       | 1.15                      | 3.11                       | 1.58                  | 1.68                  | 3.26                         | 1.85                        | 3.19                                  | 3.96                                   |
|           |         | n          | 9.00                                     | 9.00                           | 9.00                                      | 9.00                                    | 9.00                          | 9.00                                     | 9.00                        | 9.00                       | 9.00                      | 9.00                       | 9.00                  | 9.00                  | 9.00                         | 9.00                        | 9.00                                  | 9.00                                   |
| Pig#1079  | CSCs    | 1Mo        | 0.66                                     | 4.64                           |                                           |                                         |                               |                                          |                             |                            |                           |                            |                       |                       |                              |                             |                                       |                                        |
